# Supplementary material
Source: PubMed Central journal article supplement (PMC5671363)
Supplement: NIHMS915684-supplement-Supplementary_Materials.pdf [file NIHMS915684-supplement-Supplementary_Materials.pdf]

## Supplementary Materials

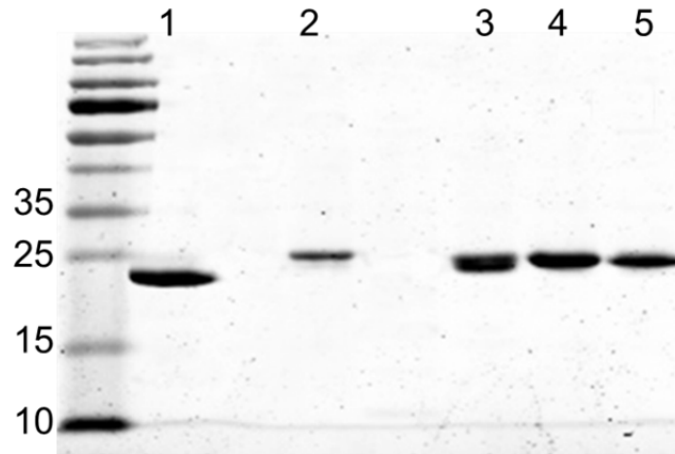

**Supporting Figure 1:** SDS-PAGE analysis of the purified designer biomimetic vectors. Lanes 1 to 5: H4G (19.75 kDa), Pep1-H4G (22.58 kDa), MPG-H4G (22.54 kDa), V<sub>ago</sub>-H4G (22.33 kDa), V<sub>anta</sub>-H4G (22.45 kDa), respectively.

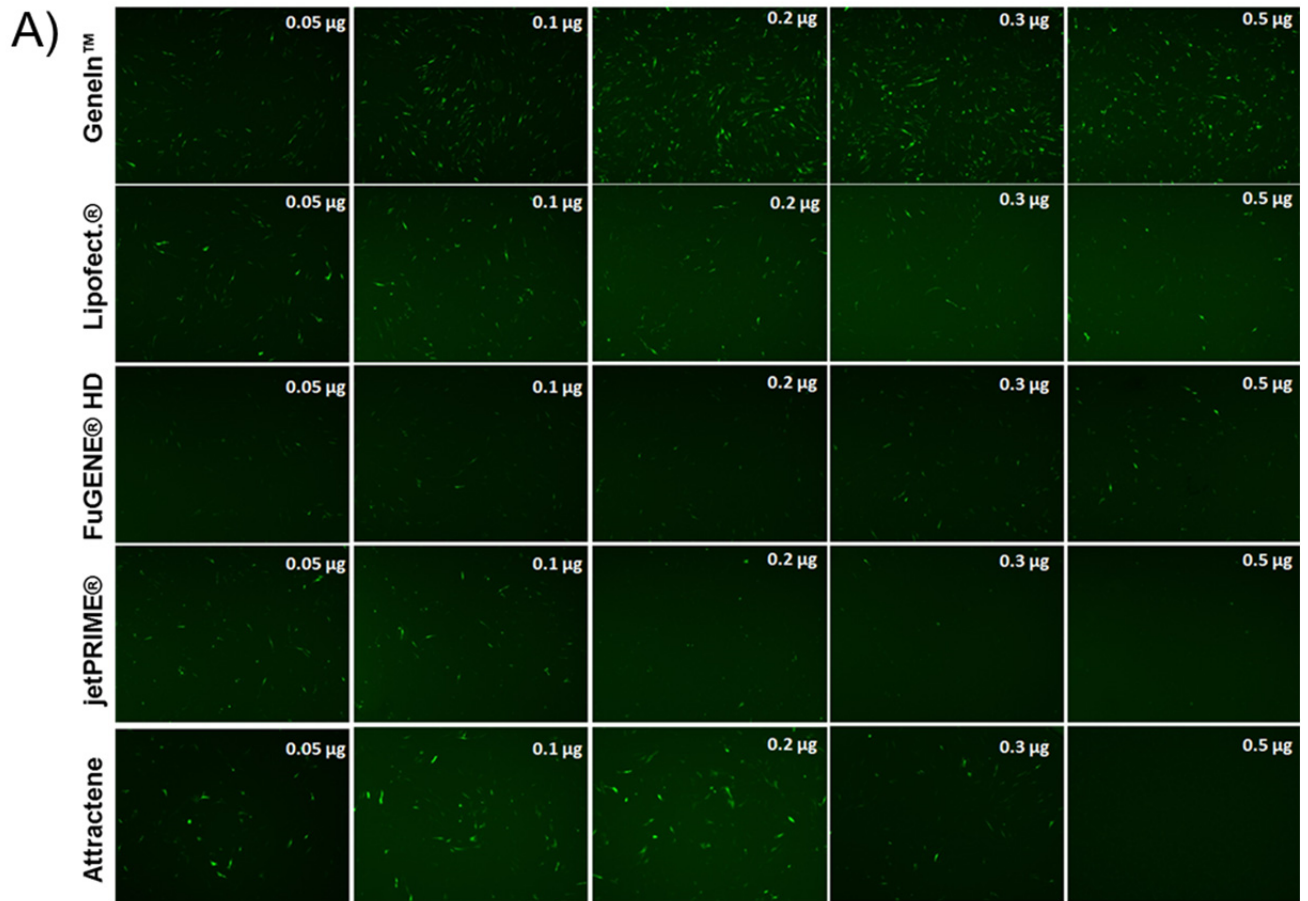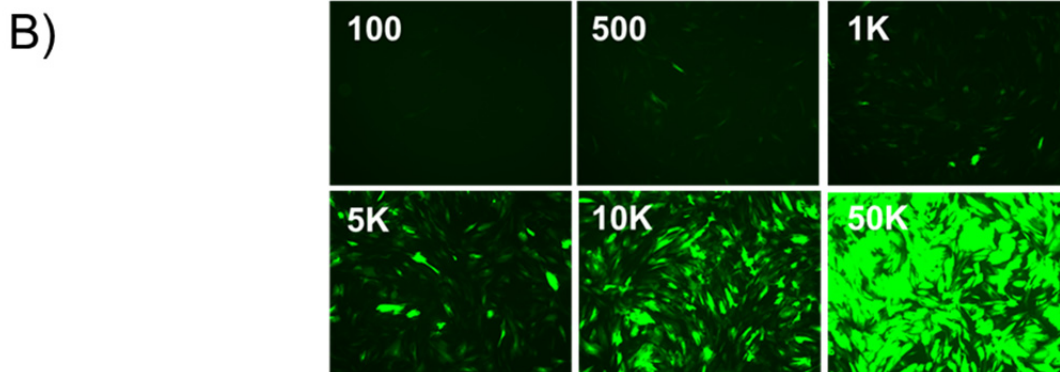

**Supporting Figure 2:** The fluorescent microscopy images of the transfected cells with commercial vectors. A) Transfected ADSCs by commercial non-viral vectors using different amounts of pEGFP. B) Transfected ADSCs by Ad-GFP at different MOIs ranging from 100 to 50,000.

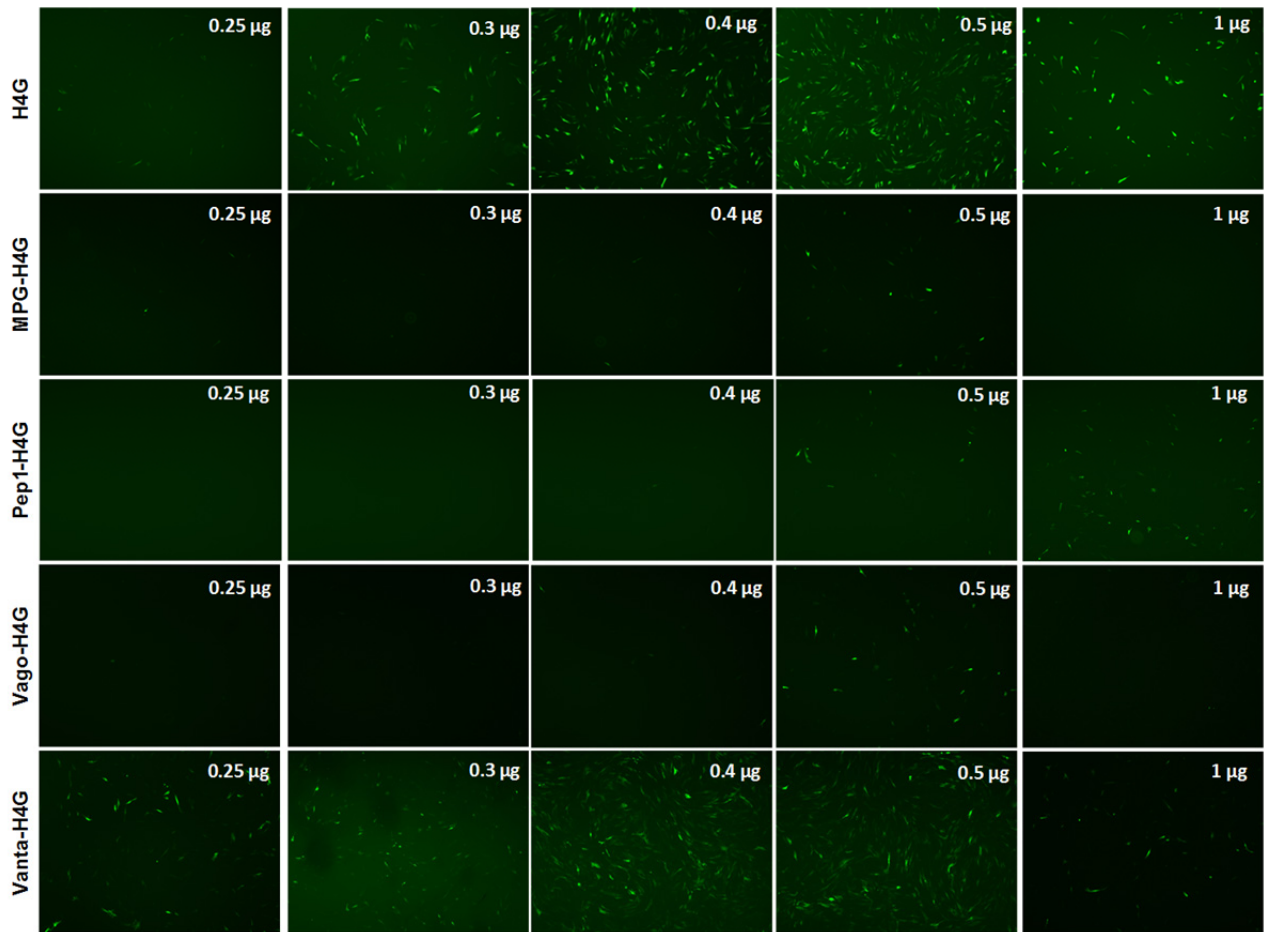

**Supporting Figure 3:** The fluorescent microscopy images of the transfected cells with DBVs using different amounts of pEGFP.

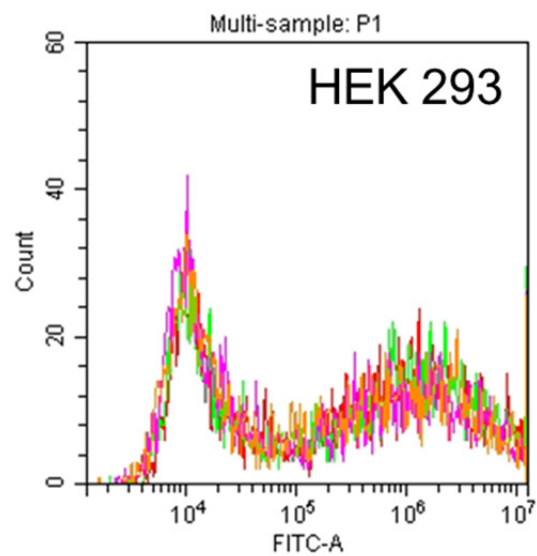

HEK 293

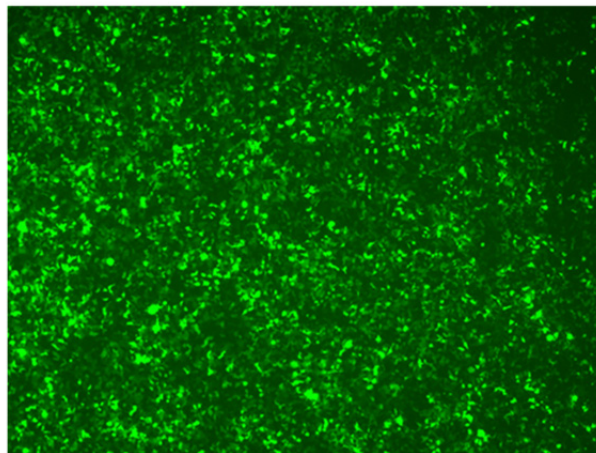

% Transfection:  $65 \pm 5$

**Supporting Figure 4:** Flow cytometry histogram (left panel) and fluorescent microscope image (right panel) of HEK293 cells transfected with H4G/pEGFP nanocomplexes. The percentage of transfected cells is determined by flow cytometry (mean $\pm$ s.d., n=3).

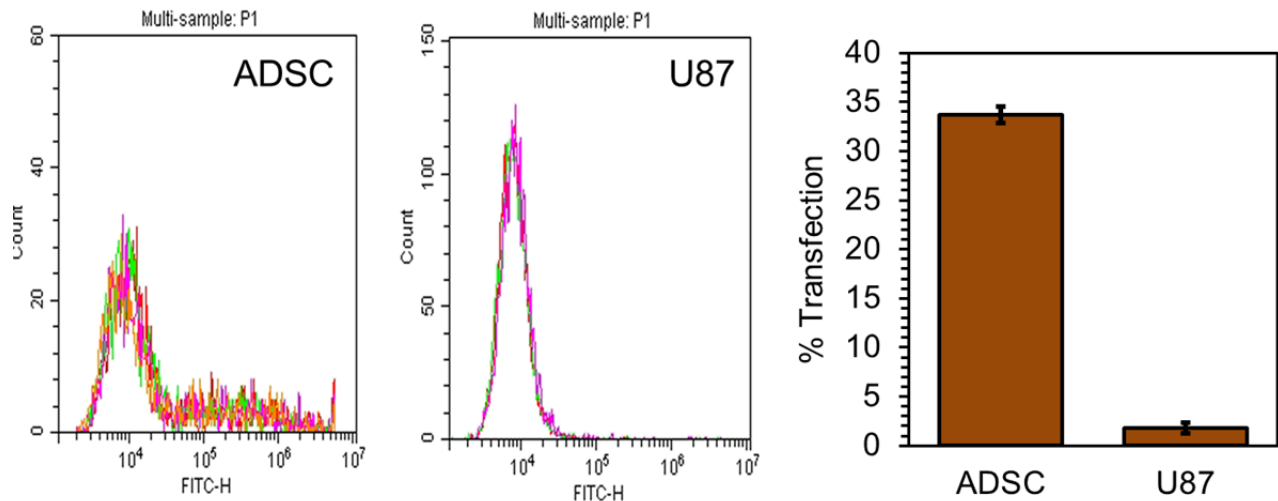

**Supporting Figure 5:** ADSC (VEGFR-1 positive) and U87 (VEGFR-1 negative) cells transfected with V<sub>anta</sub>-H4G. Left panel) Flowcytometry histogram of transfected ADSCs (n=3). Mid panel) Flowcytometry histogram of transfected U87 cells (n=3). Right panel) Bar chart showing the percentage of transfected cells in each cell line as determined by flow cytometry.

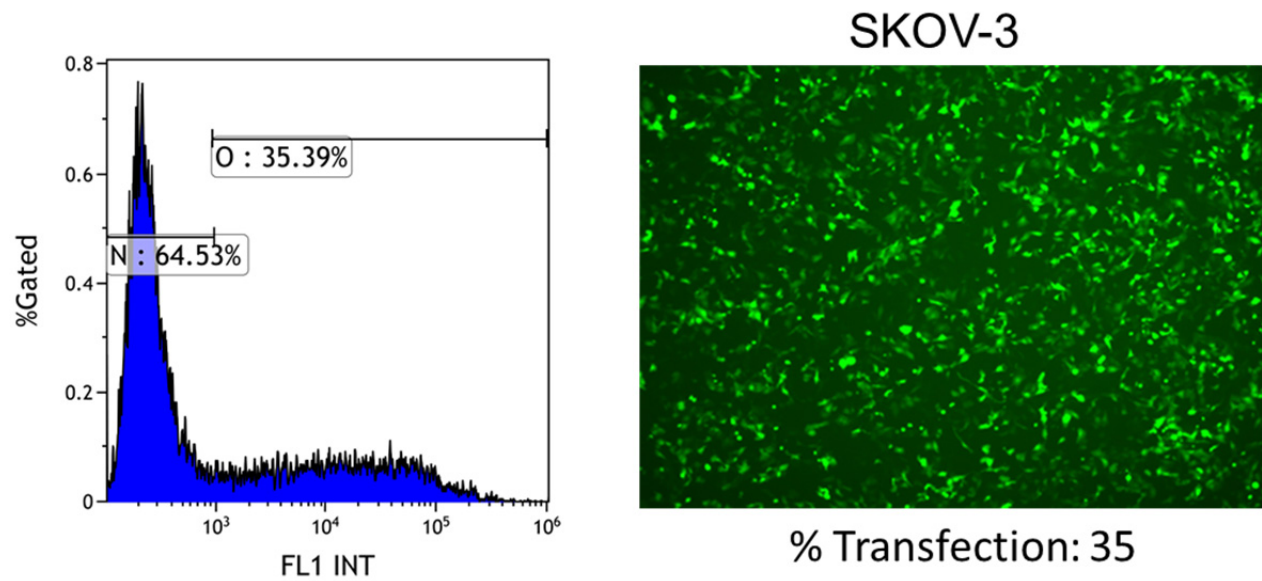

**Supporting Figure 6:** Flow cytometry histogram (left panel) and fluorescent microscope image (right panel) of SKOV-3 cells transfected with Pep1-H4G carrying 0.5 $\mu$ g of pEGFP. The percentage of transfected cells is determined by flow cytometry.

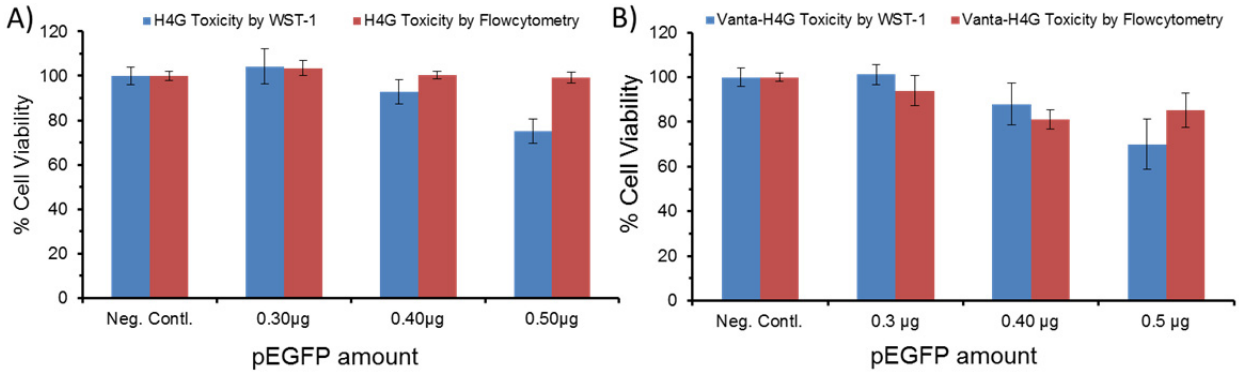

**Supporting Figure 7:** Evaluation of the ADSC viability after transfection by H4G (A) and Vanta-H4G (B) by flowcytometry. ADSCs were seeded in 96-well plates and transfected with vector/pEGFP complexes as described. Forty-eight hours post transfection, cells were washed with PBS and detached with Accutase solution at room temperature. Right before FACS analysis, 1 µl of Propidium Iodide solution (1 µg/ul) was added to each well, mixed gently and incubated for 1 minute in the dark. Cell viability (live/dead) was then quantified by flow cytometry.

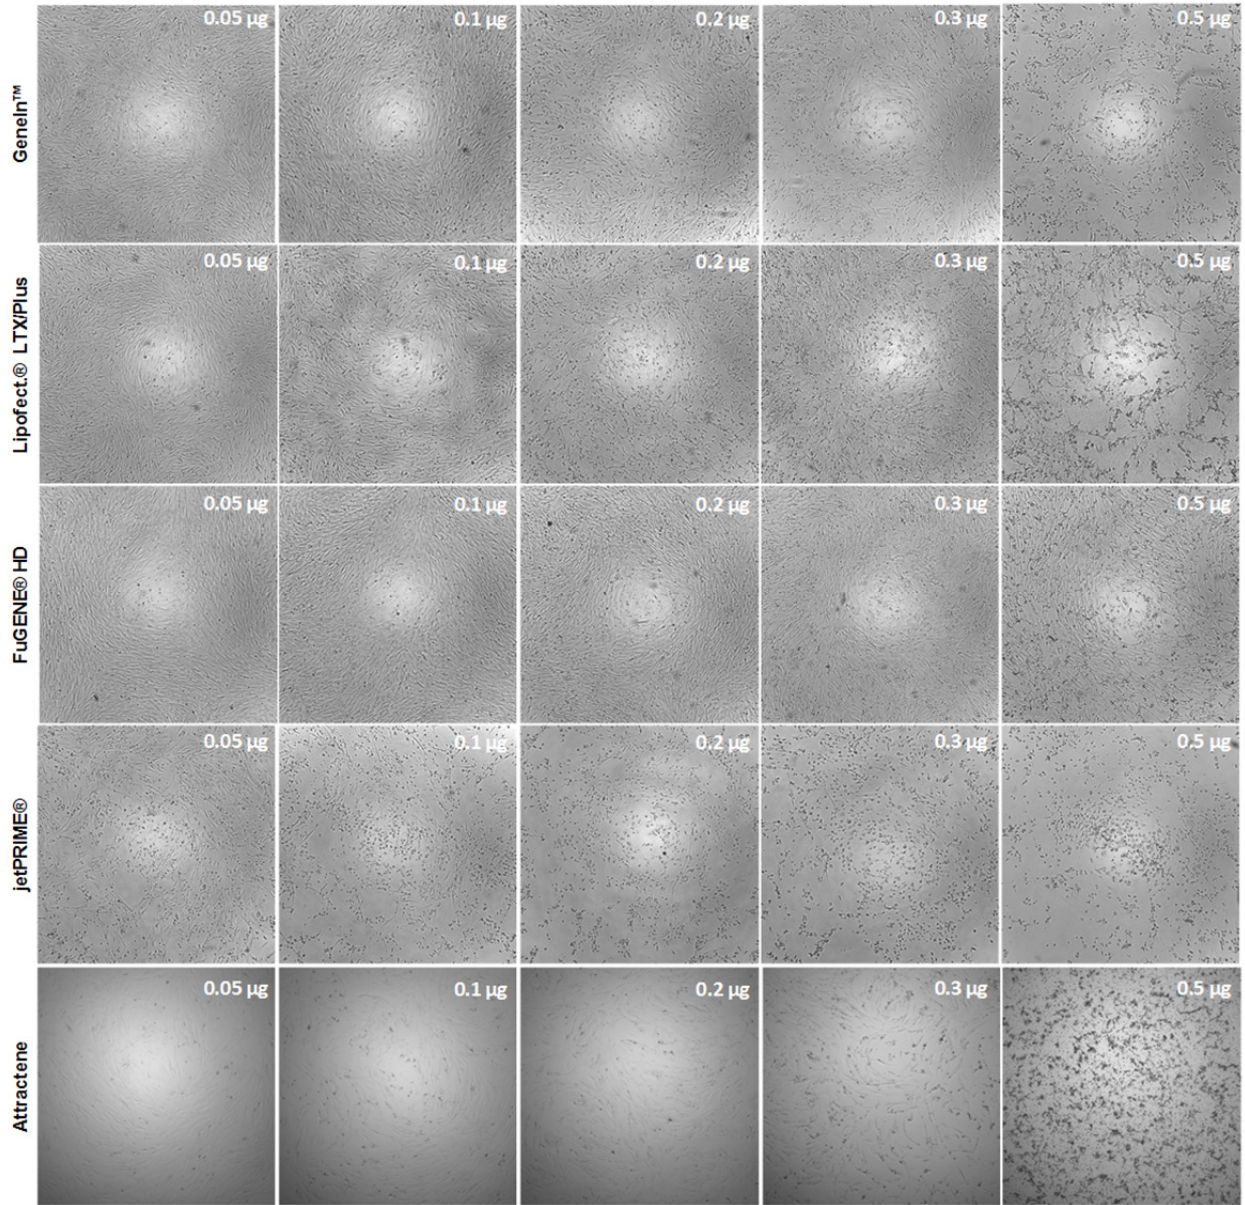

**Supporting Figure 8:** The light microscopy images of the transfected cells with commercial vectors carrying different amounts of pEGFP showing different levels of toxicities.



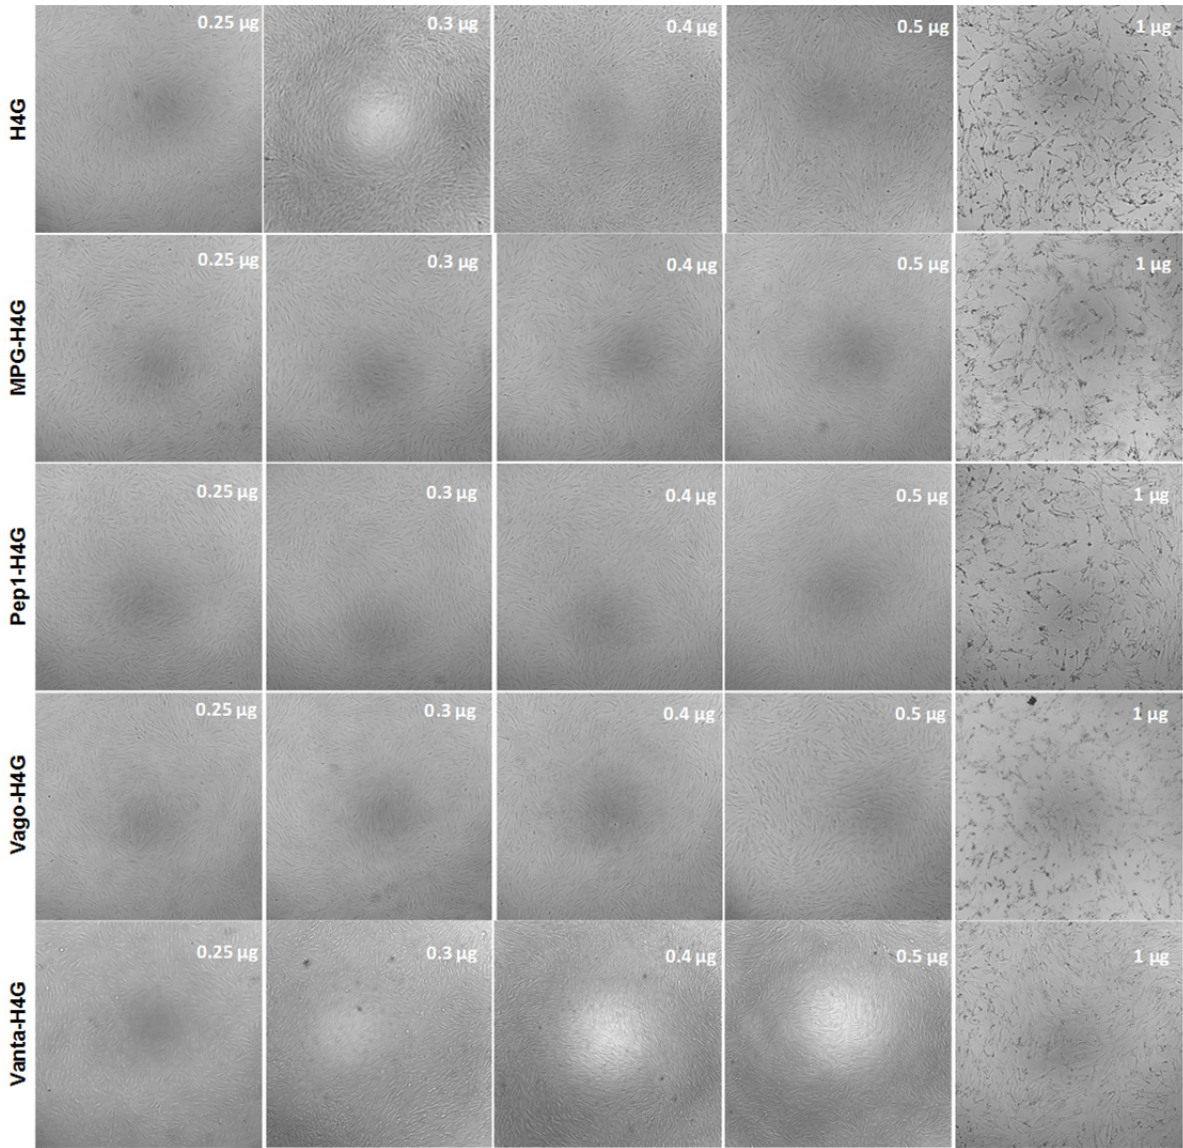

**Supporting Figure 9:** The light microscopy images of the transfected cells with DBVs carrying different amounts of pEGFP showing different levels of toxicities.

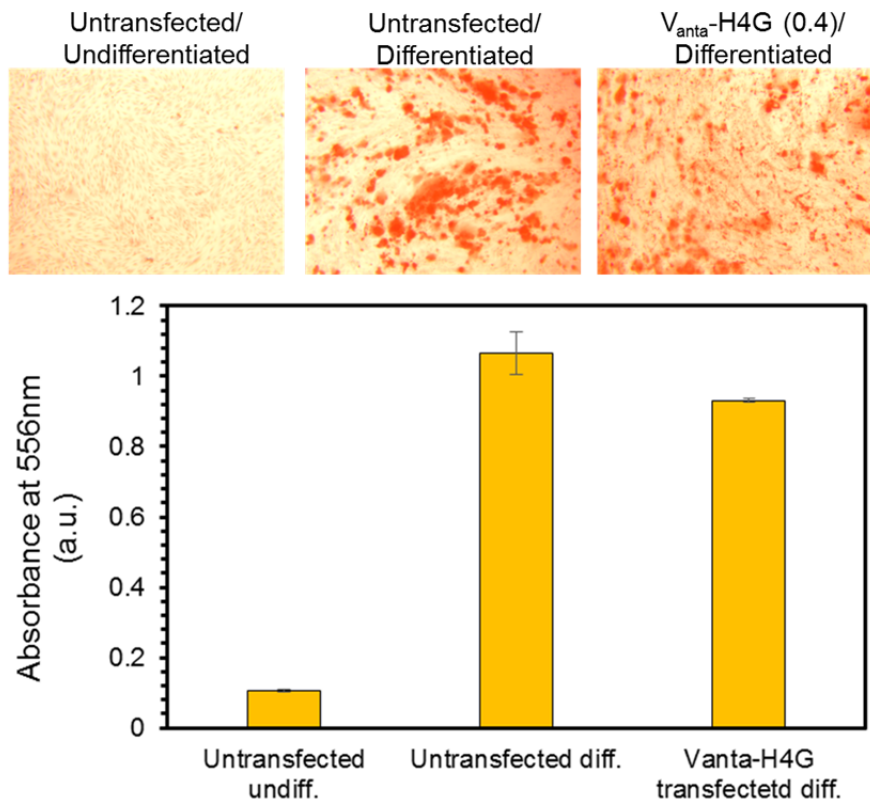

**Supporting Figure 10:** ADSC differentiation into osteocytes. Bar chart showing the percentages of differentiated cells in each treated and untreated group

**Supporting Table 1:** The names and fold changes of the dysregulated genes (out of 84 tested) post transfection. The names of the genes that were not significantly dysregulated are not shown.

| Gene Name                          | H4G (0.3µg pDNA) | H4G (0.4µg pDNA) | V <sub>anta</sub> -H4G (0.4µg pDNA) | Ad-GFP (MOI: 5K)  | Ad-GFP (MOI: 50K) |
|------------------------------------|------------------|------------------|-------------------------------------|-------------------|-------------------|
| HGF                                | NS               | NS               | NS                                  | -6.63 (p=0.001)   | -6.74 (p=0.001)   |
| KIT                                | NS               | NS               | +3.91 (p=0.008)                     | -2.54 (p=0.002)   | -3.48 (p=0.0005)  |
| KITLG                              | NS               | NS               | +2.13 (p=0.0002)                    | NS                | NS                |
| MYB                                | NS               | NS               | NS                                  | NS                | -2.11 (p=0.007)   |
| CDKN2B                             | NS               | NS               | -4.13 (p=0.001)                     | NS                | NS                |
| FHIT                               | NS               | NS               | NS                                  | +2.24 (p=0.04)    | +2.14 (p=0.004)   |
| S100A4                             | NS               | +2.35 (p=0.001)  | NS                                  | +2.79 (p=0.00002) | +2.84 (p=0.0002)  |
| SERPIN5                            | NS               | NS               | +12.38 (p=0.00005)                  | NS                | NS                |
| BCR                                | NS               | NS               | NS                                  | NS                | +2.11 (p=0.002)   |
| FOS                                | NS               | -2.21 (p=0.0002) | -2.08 (P=0.000006)                  | NS                | NS                |
| TNF                                | NS               | -2.50 (P=0.03)   | -4.02 (p=0.02)                      | NS                | NS                |
| CDKN2A                             | NS               | NS               | NS                                  | -2.03 (p=0.00007) | -2.26 (p=0.00004) |
| CDH1                               | NS               | NS               | NS                                  | NS                | +2.14 (p=0.004)   |
| BCL2                               | NS               | NS               | NS                                  | +2.50 (p=0.04)    | +2.53 (p=0.008)   |
| <b>Total No. of Affected Genes</b> | 0                | 3                | 6                                   | 6                 | 9                 |

NS: No Significant Change (less than 2 fold or  $p > 0.05$ )

+ : up-regulated

- : down-regulated
